# Supplementary material
Source: PubMed Central journal article supplement (PMC5575754)
Supplement: NIHMS898311-supplement-Supplementary_File.pdf [file NIHMS898311-supplement-Supplementary_File.pdf]

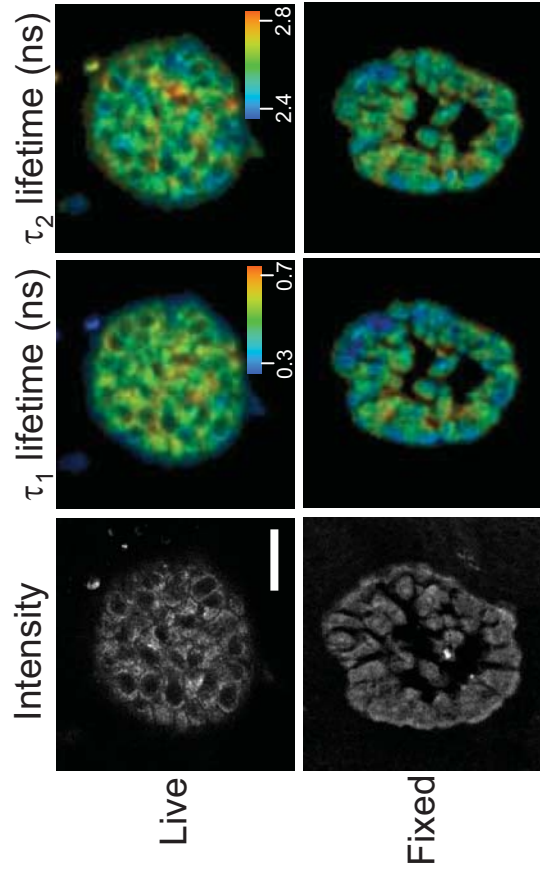

|                                                                       | $\tau_1$ (ps) |              | $\tau_2$ (ps) |                | $a_1$      |            |
|-----------------------------------------------------------------------|---------------|--------------|---------------|----------------|------------|------------|
|                                                                       | Gels          | Slides       | Gels          | Slides         | Gels       | Slides     |
| 890 nm excitation<br>[n= 21 and 16]                                   | 413 $\pm$ 75  | 444 $\pm$ 39 | 2641 $\pm$ 59 | 2652 $\pm$ 79  | 55 $\pm$ 4 | 53 $\pm$ 7 |
| 780 nm excitation<br>[n= 20 and 15]<br>n= 6 gels/tissue blocks imaged | 467 $\pm$ 48  | 490 $\pm$ 54 | 2649 $\pm$ 63 | 2702 $\pm$ 101 | 55 $\pm$ 3 | 54 $\pm$ 3 |

Supplemental Figure 1
